# Supplementary material
Source: ML conference proceedings conference paper supplement (https://openreview.net/forum?id=DrIZZwEZtM)
Supplement: supplementary_material [file attachment]

## A Appendix

### A.1 Theorem 3.1

First, we need the following theorem:

**Theorem A.1** ([Liu et al., 2022]). *Let  $\mu_t = \sqrt{\lim_{\varepsilon \rightarrow +\infty} \frac{\varepsilon^2}{-2 \log \delta_{\mathcal{A}}(\varepsilon)}}$ . A privacy mechanism  $\mathcal{A}$  with the privacy profile  $\delta_{\mathcal{A}}(\varepsilon)$  is  $\mu$ -GDP if and only if  $\mu_t < \infty$  and  $\mu$  is no smaller than  $\mu_t$ .*

Theorem A.1 implies that a mechanism is  $\mu$ -GDP if the privacy profile  $\delta_{\mathcal{A}}$  takes the form  $e^{-O(\varepsilon^2)}$  as  $\varepsilon \rightarrow \infty$ .

Additionally, we need the Bishop-Gromov comparison theorem:

**Theorem A.2** (Bishop-Gromov [Petersen, 2006]). *Let  $M$  be a complete  $n$ -dimensional Riemannian manifold whose Ricci curvature satisfies the lower bound*

$$\text{Ric} \geq (n-1)K$$

*for a constant  $K \in \mathbb{R}$ . Let  $M_K^n$  be the complete  $n$ -dimensional simply connected space of constant sectional curvature  $K$  (and hence of constant Ricci curvature  $(n-1)K$ ). Denote by  $B(p, r)$  the ball of radius  $r$  around a point  $p$ , defined with respect to the Riemannian distance function. Then, for any  $p \in M$  and  $p_K \in M_K^n$ , the function*

$$\phi(r) = \frac{\text{Vol } B(p, r)}{\text{Vol } B(p_K, r)}$$

*is non-increasing on  $(0, \infty)$ . As  $r$  goes to zero, the ratio approaches one, so together with the monotonicity this implies that*

$$\text{Vol } B(p, r) \leq \text{Vol } B(p_K, r).$$

Bishop-Gromov comparison theorem not only gives us the control of volume growth of certain manifolds but also gives a rough classification by sectional curvature. Besides, this is a global property in the sense that  $p$  and  $p_K$  can be arbitrary points on the manifolds.

#### A.1.1 Proof of Theorem 3.1

*Proof.* By A.1, we only need to show that for any  $x \in \mathcal{M}$ , when  $\varepsilon \rightarrow \infty$ ,

$$\int_A p_{\eta, \sigma}(y) d\nu(y) = e^{-O(\varepsilon^2)}$$

where  $A$  is given by

$$A = \{y \in \mathcal{M} \mid p_{\eta, \sigma}(y)/p_{\eta', \sigma}(y) > e^\varepsilon\}$$

Let's consider  $\mathcal{M} \setminus A = \{y \in \mathcal{M} : p_{\eta, \sigma}(y)/p_{\eta', \sigma}(y) \leq e^\varepsilon\}$ . We have

$$\begin{aligned} & \log \left( \frac{p_{\eta, \sigma}(y)}{p_{\eta', \sigma}(y)} \right) \\ &= \frac{1}{2\sigma^2} (d(\eta, y)^2 - d(\eta', y)^2) + C \\ &\leq \frac{\Delta}{2\sigma^2} (2d(\eta, y) + \Delta) + C, \quad \text{by triangular inequality,} \end{aligned}$$

where  $C = \log(Z(\eta, \sigma)) - \log(Z(\eta', \sigma))$ . Thus we have,

$$d(\eta, y) \leq \frac{2\sigma^2(\varepsilon - C) - \Delta^2}{2\Delta} \implies \frac{p_{\eta, \sigma}(y)}{p_{\eta', \sigma}(y)} \leq e^\varepsilon$$

Let  $r = \frac{2\sigma^2(\varepsilon - C) - \Delta^2}{2\Delta}$ , note that since  $B_\eta(r) \subseteq \mathcal{M} \setminus A$ , we have  $A \subseteq \mathcal{M} \setminus B_\eta(r)$ . Thus, we only need to prove the following:

$$\int_{\mathcal{M} \setminus B_\eta(r)} p_{\eta, \sigma^2}(y) d\nu(y) = e^{-O(\varepsilon^2)}$$

540 when  $\varepsilon \rightarrow \infty$ . One can easily show the following inequality,

$$\int_{B_\eta(2r) \setminus B_\eta(r)} p_{\eta,\sigma}(y) d\nu(y) \leq e^{-\frac{r^2}{\sigma^2}} (\text{Vol } B(\eta, 2r) - \text{Vol } B(\eta, r)) \quad (4)$$

541 By Theorem A.2, we have the following three cases:

542 1.  $K > 0$ . Then the standard space  $M_K^n$  is the  $n$ -sphere of radius  $1/\sqrt{K}$ . ( $\text{Vol } B(\eta, 2r) -$   
543  $\text{Vol } B(\eta, r)$ ) is obviously less than the volume of the whole space  $M_K^n$ . Thus we have

$$\int_{B_\eta(2r) \setminus B_\eta(r)} p_{\eta,\sigma}(y) d\nu(y) \leq e^{-\frac{r^2}{\sigma^2}} s(n) \sqrt{K}^{1-n} \quad (5)$$

544 where  $s(n) = \frac{2\pi^{\frac{n}{2}}}{\Gamma(\frac{n}{2})}$  is a constant relative to the dimension  $n$ . One can easily find that as  
545  $\varepsilon \rightarrow \infty$ ,  $B_\eta(2r)$  will cover the  $M_K^n$ , and the right-hand side of inequality 5 will approach to  
546 0 as  $e^{-O(\varepsilon^2)}$ .

547 2.  $K = 0$ . Then the standard space  $M_K^n$  is the  $n$  dimensional Euclidean space  $\mathbb{R}^n$ . We have

$$\int_{B_\eta(2r) \setminus B_\eta(r)} p_{\eta,\sigma}(y) d\nu(y) \leq e^{-\frac{r^2}{\sigma^2}} \frac{\pi^{n/2} r^n}{\Gamma(\frac{n}{2} + 1)}. \quad (6)$$

548 The same with above, when  $\varepsilon \rightarrow \infty$ ,  $B_\eta(2r)$  will cover the  $\mathbb{R}^n$  and the right-hand side of 6  
549 will approach to 0 as  $e^{-O(\varepsilon^2)}$ .

550 3.  $K < 0$ . The standard space  $M_n(K)$  is the hyperbolic  $n$ -space  $\mathbb{H}^n$ . The hyperbolic volume  
551  $\text{Vol } B(\eta_K, r)$  with any  $\eta_K \in \mathbb{H}^n$  is given by

$$\text{Vol } B(\eta_K, r) = s(n) \int_0^r \left( \frac{\sinh(\sqrt{-K}t)}{\sqrt{-K}} \right)^{n-1} dt \quad (7)$$

552 where the hyperbolic function is given by  $\sinh(x) = (e^x - e^{-x})/2$ . It's not hard to see that

$$\sinh^n(t) \leq \frac{(n+1)e^{nt}}{2^n}. \quad (8)$$

553 Plugging the 8 into 7, we have

$$\text{Vol } B(\eta_K, r) \leq s_n \frac{n}{(n-1)2^{n-1}\sqrt{-K}^n} e^{\sqrt{-K}(n-1)r}. \quad (9)$$

554 Combining 9 and 4, we have

$$\int_{B_\eta(2r) \setminus B_\eta(r)} p_{\eta,\sigma}(y) d\nu(y) \leq c(n) e^{-\frac{r^2}{\sigma^2} + \sqrt{-K}(n-1)2r}. \quad (10)$$

555 The principle part of the exponent of the right-hand side of 10 is still  $-\varepsilon^2$ . Thus, when  
556  $\varepsilon \rightarrow \infty$ , it approaches to 0 as  $e^{-O(\varepsilon^2)}$ .

557 □

## 558 A.2 Theorem 3.2

559 *Proof.* Follows directly from Definition 2.2, Theorem 3.1 and Theorem 5 in Balle and Wang [2018].  
560 □

## 561 A.3 Corollary 3.2.1

562 *Proof.* In this proof, we will parameterize points on  $S^1$  using their polar angles.

563 On  $S^1$ , the Riemannian Gaussian distribution with footprint  $\eta$  and rate  $\sigma$  has the following density,

$$p_{\eta,\sigma}(\theta) = \frac{1}{Z_\sigma} e^{-\frac{1}{2\sigma^2}(\theta - \eta \bmod \pi)^2}, \quad Z_\sigma = \sqrt{2\pi}\sigma \left[ \Phi\left(\frac{\pi}{\sigma}\right) - \Phi\left(-\frac{\pi}{\sigma}\right) \right].$$

564 Note that since  $S^1$  has constant curvature, we can use Theorem 4.1 instead of Theorem 3.2

565 WLOG we assume  $\eta_1 = 2\pi - \frac{\Delta}{2}$  and  $\eta_2 = \frac{\Delta}{2}$  and thus  $d(\eta_1, \eta_2) = \Delta$ . Given an arbitrary  $\varepsilon$ , the set  
566  $A$  takes the following form,

$$A = \left[ \pi + \frac{\sigma^2 \varepsilon}{\Delta}, 2\pi - \frac{\sigma^2 \varepsilon}{\Delta} \right].$$

567 and it follows that we must have

$$\varepsilon \in [0, \pi\Delta/(2\sigma^2)]. \quad (11)$$

568 Thus we have

$$\begin{aligned} & \int_A p_{\eta_1, \sigma}(y) d\nu(y) - e^\varepsilon \int_A p_{\eta_2, \sigma}(y) d\nu(y) \\ &= \frac{1}{Z_\sigma} \left[ \int_A e^{-\frac{1}{2\sigma^2}(\eta_1 - \theta \bmod \pi)^2} d\theta - e^\varepsilon \int_A e^{-\frac{1}{2\sigma^2}(\eta_2 - \theta \bmod \pi)^2} d\theta \right] \\ &= \frac{1}{Z_\sigma} \left[ \int_{\pi + \frac{\sigma^2 \varepsilon}{\Delta}}^{2\pi - \frac{\sigma^2 \varepsilon}{\Delta}} e^{-\frac{1}{2\sigma^2}(\eta_1 - \theta \bmod \pi)^2} d\theta - e^\varepsilon \int_A e^{-\frac{1}{2\sigma^2}(\eta_2 - \theta \bmod \pi)^2} d\theta \right] \\ &= \frac{1}{Z_\sigma} \left[ \int_{\pi + \frac{\sigma^2 \varepsilon}{\Delta}}^{2\pi - \frac{\sigma^2 \varepsilon}{\Delta}} e^{-\frac{1}{2\sigma^2}(\eta_1 - \theta)^2} d\theta - e^\varepsilon \int_A e^{-\frac{1}{2\sigma^2}(\eta_2 - \theta \bmod \pi)^2} d\theta \right] \\ &= \frac{1}{Z_\sigma} \left[ \Phi\left(\frac{2\pi}{\sigma} - \frac{\sigma\varepsilon}{\Delta} - \frac{\eta_1}{\sigma}\right) - \Phi\left(\frac{\pi}{\sigma} + \frac{\sigma\varepsilon}{\Delta} - \frac{\eta_1}{\sigma}\right) - e^\varepsilon \int_A e^{-\frac{1}{2\sigma^2}(\eta_2 - \theta \bmod \pi)^2} d\theta \right] \\ &= \frac{1}{Z_\sigma} \left[ \Phi\left(-\frac{\sigma\varepsilon}{\Delta} + \frac{\Delta}{2\sigma}\right) - \Phi\left(\frac{\sigma\varepsilon}{\Delta} + \frac{\Delta}{2\sigma} - \frac{\pi}{\sigma}\right) - e^\varepsilon \int_A e^{-\frac{1}{2\sigma^2}(\eta_2 - \theta \bmod \pi)^2} d\theta \right]. \end{aligned}$$

569 We have evaluated the first integral, and now let's consider the second integral. For  $\varepsilon \leq \frac{\Delta^2}{2\sigma^2}$ , we have

$$\begin{aligned} & \int_A e^{-\frac{1}{2\sigma^2}(\mu_2 - \theta \bmod \pi)^2} d\theta \\ &= \int_{\pi + \frac{\sigma^2 \varepsilon}{\Delta}}^{\mu_2 + \pi} e^{-\frac{1}{2\sigma^2}(\theta - \mu_2)^2} d\theta + \int_{\mu_2 + \pi}^{2\pi - \frac{\sigma^2 \varepsilon}{\Delta}} e^{-\frac{1}{2\sigma^2}(\theta - (2\pi + \mu_2))^2} d\theta \\ &= \sqrt{2\pi}\sigma \left[ \Phi\left(\frac{\pi}{\sigma}\right) - \Phi\left(\frac{\pi}{\sigma} + \frac{\sigma\varepsilon}{\Delta} - \frac{\Delta}{2\sigma}\right) + \Phi\left(-\frac{\sigma\varepsilon}{\Delta} - \frac{\Delta}{2\sigma}\right) - \Phi\left(-\frac{\pi}{\sigma}\right) \right]. \end{aligned}$$

570 Thus for  $\varepsilon \leq \frac{\Delta^2}{2\sigma^2}$  we have,

$$\begin{aligned} & \int_A p_{\eta_1, \sigma}(y) d\nu(y) - e^\varepsilon \int_A p_{\eta_2, \sigma}(y) d\nu(y) \\ &= \frac{\sqrt{2\pi}\sigma}{Z_\sigma} \left[ \Phi\left(-\frac{\sigma\varepsilon}{\Delta} + \frac{\Delta}{2\sigma}\right) - e^\varepsilon \Phi\left(-\frac{\sigma\varepsilon}{\Delta} - \frac{\Delta}{2\sigma}\right) \right] \\ & \quad - \frac{\sqrt{2\pi}\sigma}{Z_\sigma} \left[ \Phi\left(\frac{\sigma\varepsilon}{\Delta} + \frac{\Delta}{2\sigma} - \frac{\pi}{\sigma}\right) - e^\varepsilon \Phi\left(\frac{\sigma\varepsilon}{\Delta} - \frac{\Delta}{2\sigma} + \frac{\pi}{\sigma}\right) \right] \\ & \quad - e^\varepsilon. \end{aligned} \quad (12)$$

571 Similarly, for  $\varepsilon > \frac{\Delta^2}{2\sigma^2}$ , we have,

$$\begin{aligned} & \int_A e^{-\frac{1}{2\sigma^2}(\mu_2 - \theta \bmod \pi)^2} d\theta \\ &= \int_{\pi + \frac{\sigma^2 \varepsilon}{\Delta}}^{2\pi - \frac{\sigma^2 \varepsilon}{\Delta}} e^{-\frac{1}{2\sigma^2}(\theta - (2\pi + \mu_2))^2} d\theta \\ &= \sqrt{2\pi}\sigma \left[ \Phi\left(-\frac{\sigma\varepsilon}{\Delta} - \frac{\Delta}{2\sigma}\right) - \Phi\left(-\frac{\pi}{\sigma} + \frac{\sigma\varepsilon}{\Delta} - \frac{\Delta}{2\sigma}\right) \right]. \end{aligned}$$

572 Thus for  $\varepsilon > \frac{\Delta^2}{2\sigma^2}$  we have,

$$\begin{aligned}
& \int_A p_{\eta_1, \sigma}(y) d\nu(y) - e^\varepsilon \int_A p_{\eta_2, \sigma}(y) d\nu(y) \\
&= \frac{\sqrt{2\pi}\sigma}{Z_\sigma} \left[ \Phi\left(-\frac{\sigma\varepsilon}{\Delta} + \frac{\Delta}{2\sigma}\right) - e^\varepsilon \Phi\left(-\frac{\sigma\varepsilon}{\Delta} - \frac{\Delta}{2\sigma}\right) \right] \\
&\quad - \frac{\sqrt{2\pi}\sigma}{Z_\sigma} \left[ \Phi\left(\frac{\sigma\varepsilon}{\Delta} + \frac{\Delta}{2\sigma} - \frac{\pi}{\sigma}\right) - e^\varepsilon \Phi\left(\frac{\sigma\varepsilon}{\Delta} - \frac{\Delta}{2\sigma} - \frac{\pi}{\sigma}\right) \right].
\end{aligned} \tag{13}$$

573 Put (11), (12) and (13) together with Theorem 4.1, we have proved Corollary 3.2.1.  $\square$

#### 574 A.4 Homogeneous Riemannian Manifolds

575 For more detailed treatment on homogenous Riemannian manifolds and related concepts, refers to  
576 Helgason [1962], Berestovskii and Nikonorov [2020], Lee [2006] for details and Chakraborty and  
577 Vemuri [2019] for a more concise summary.

##### 578 A.4.1 Group actions on Manifolds

579 In this section, we will introduce some basic facts about group action which will be used to introduce  
580 homogeneous Riemannian manifolds in later section. The materials covered in this section can be  
581 found in any standard Abstract Algebra texts.

582 **Definition A.1.** A **group**  $(G, \cdot)$  is a non-empty set  $G$  together with a binary operation  $\cdot : G \times G \rightarrow$   
583  $G, (a, b) \mapsto a \cdot b$  such that the following three axioms are satisfied:

- 584 • **Associativity:**  $\forall a, b, c \in G, (a \cdot b) \cdot c = a(b \cdot c)$
- 585 • **Identity element:**  $\exists e \in G, \forall a \in G, a \cdot e = e \cdot a = a.$
- 586 • **Inverse element:**  $\forall a \in G, \exists a^{-1} \in G, a \cdot a^{-1} = a^{-1} \cdot a = e.$

587 **Definition A.2.** Let  $G$  be a group and  $X$  be an arbitrary set. A **left group action** is a map  
588  $\alpha : G \times X \rightarrow X$ , that satisfies the following axioms:

- 589 •  $\alpha(e, x) = x$
- 590 •  $\alpha(g, \alpha(h, x)) = \alpha(gh, x)$

591 Note here we use the juxtaposition  $gh$  to denote the binary operation in the group. If we shorten  
592  $\alpha(g, x)$  by  $g \cdot x$ , it's equivalent to say that  $e \cdot x = x$ , and  $g \cdot (h \cdot x) = (gh) \cdot x$

593 Note each  $g \in G$  induces a map  $L_g : X \rightarrow X, x \mapsto g \cdot x.$

##### 594 A.4.2 Homogeneous Riemannian manifolds, symmetric spaces and spaces of constant 595 curvature

596 Let  $\mathcal{M}$  be a Riemannian manifold and  $I(\mathcal{M})$  be the set of all isometries of  $\mathcal{M}$ , that is, given  
597  $g \in I(\mathcal{M}), d(g \cdot x, g \cdot y) = d(x, y)$ , for all  $x, y \in \mathcal{M}$ . It is clear that  $I(\mathcal{M})$  forms a group, and thus,  
598 for a given  $g \in I(\mathcal{M})$  and  $x \in \mathcal{M}, g \cdot x \mapsto y$ , for some  $y \in \mathcal{M}$  is a group action. We call  $I(\mathcal{M})$  the  
599 isometry group of  $\mathcal{M}$ .

600 Consider  $o \in \mathcal{M}$ , and let  $H = \text{Stab}(o) = \{h \in G \mid h \cdot o = o\}$ , that is,  $H$  is the **Stabilizer** of  $o \in \mathcal{M}$ .  
601 Given  $g \in I(\mathcal{M})$ , its linear representation  $g \mapsto d_x g$  in the tangent space  $T_x \mathcal{M}$  is called the **isotropy**  
602 **representation** and the linear group  $d_x \text{Stab}(x)$  is called the **isotropy group** at the point  $x$ .

603 We say that  $G$  acts transitively on  $\mathcal{M}$ , iff, given  $x, y \in \mathcal{M}$ , there exists a  $g \in \mathcal{M}$  such that  $y = g \cdot x$ .

604 **Definition A.3** ([Helgason, 1962]). Let  $G = I(\mathcal{M})$  act transitively on  $\mathcal{M}$  and  $H = \text{Stab}(o), o \in \mathcal{M}$   
605 (called the "origin" of  $\mathcal{M}$ ) be a subgroup of  $G$ . Then  $\mathcal{M}$  is called a **homogeneous Riemannian**  
606 **manifold** and can be identified with the quotient space  $G/H$  under the diffeomorphic mapping  
607  $gH \mapsto g \cdot o, g \in G$ .

By definition, we have  $d(x, y) = d(g \cdot x, g \cdot y)$  for any  $g \in G$  and any  $x, y \in \mathcal{M}$ . More importantly, any integrable function  $f : \mathcal{M} \rightarrow \mathbb{R}$ , we have [Helgason, 1962]

$$\int_{\mathcal{M}} f(x) d\nu(x) = \int_{\mathcal{M}} f(g \cdot x) d\nu(x)$$

This property leads to Proposition 4.1.

**Definition A.4** ([Helgason, 1962]). A Riemannian symmetric space is a Riemannian manifold  $\mathcal{M}$  such that for any  $x \in \mathcal{M}$ , there exists  $s_x \in G = I(\mathcal{M})$  such that  $s_x \cdot x = x$  and  $ds_x|_x = -I$ .  $S_x$  is called symmetry at  $x$ .

That is, a Riemannian symmetric space is a Riemannian manifold  $\mathcal{M}$  with the property that the geodesic reflection at any point is an isometry of  $\mathcal{M}$ . Note that any Riemannian symmetric space is a homogeneous Riemannian manifold, but the converse is not true.

**Definition A.5** ([Vinberg et al., 1993]). A simply-connected homogeneous Riemannian manifold is said to be a **space of constant curvature** if its isotropy group (at each point) is the group of all orthogonal transformations with respect to some Euclidean metric.

Once again, a space of constant curvature is a symmetric space but the converse is not true.

#### A.5 Theorem 4.1

*Proof.* Let  $G$  be the isometry group of  $\mathcal{M}$ . Let  $\eta_1, \eta_2 \in \mathcal{M}$  be arbitrary points such that  $d(\eta_1, \eta_2) = \Delta$ . By Corollary 4.1, the set  $A$  reduces to  $A = \{y \in \mathcal{M} : d(\eta_2, y)^2 - d(\eta_1, y)^2 \geq 2\sigma^2\varepsilon\}$ .

What we need to show is the following, for any points  $\eta'_1, \eta'_2 \in \mathcal{M}$  such that  $d(\eta'_1, \eta'_2) = \Delta$ ,

$$\int_A p_{\eta_1, \sigma}(y) d\nu(y) - e^\varepsilon \int_A p_{\eta_2, \sigma}(y) d\nu(y) = \int_{A'} p_{\eta'_1, \sigma}(y) d\nu(y) - e^\varepsilon \int_{A'} p_{\eta'_2, \sigma}(y) d\nu(y)$$

where  $A' = \{y \in \mathcal{M} : d(\eta'_2, y)^2 - d(\eta'_1, y)^2 \geq 2\sigma^2\varepsilon\}$ . It's sufficient to show

$$\int_A p_{\eta_1, \sigma}(y) = \int_{A'} p_{\eta'_1, \sigma}(y) d\nu(y), \quad \int_A p_{\eta_2, \sigma}(y) = \int_{A'} p_{\eta'_2, \sigma}(y) d\nu(y). \quad (14)$$

We can separate the proof into three cases: (1)  $\eta'_1 = \eta_1, \eta'_2 \neq \eta_2$ ; (2)  $\eta'_1 \neq \eta_1, \eta'_2 = \eta_2$ ; (3)  $\eta'_1 \neq \eta_1, \eta'_2 \neq \eta_2$ .

Case (1):  $\eta'_1 = \eta_1, \eta'_2 \neq \eta_2$ :

It follows that  $\eta_2$  is in the sphere centered at  $\eta$  with radius  $\Delta$ . (14) then follows from the rotational symmetry of the constant curvature spaces.

Case (2):  $\eta'_1 \neq \eta_1, \eta'_2 = \eta_2$ :

Same as case (1).

Case (3):  $\eta'_1 \neq \eta_1, \eta'_2 \neq \eta_2$ :

For any  $\eta'_1 \neq \eta_1$ , there exists  $g \in G$ , such that  $g \cdot \eta_1 = \eta'_1$ . Denote  $\eta'_2 = g \cdot \eta_2$ , we have

$$\begin{aligned} gA &:= \{g \cdot y : d(\eta_2, y)^2 - d(\eta_1, y)^2 \geq 2\sigma^2\varepsilon\} \\ &= \{g \cdot y : d(\eta'_2, g \cdot y)^2 - d(\eta'_1, g \cdot y)^2 \geq 2\sigma^2\varepsilon\} \\ &= \{y : d(\eta'_2, y)^2 - d(\eta'_1, y)^2 \geq 2\sigma^2\varepsilon\} \\ &= A'. \end{aligned}$$

635 Let  $F(y) := p_{\eta_1, \sigma}(y) \mathbf{1}_A(y)$ , we have

$$\begin{aligned}
& \int_A p_{\eta_1, \sigma}(y) d\nu(y) \\
&= \int_{\mathcal{M}} F \circ L_g^{-1}(y) d\nu(y) \\
&= \int_{\mathcal{M}} p_{\eta_1, \sigma}(g^{-1} \cdot y) \mathbf{1}_{gA}(y) d(L_g^{-1})^* \nu(y); \quad \text{change of variable formular,} \\
&= \int_{\mathcal{M}} p_{\eta_1, \sigma}(g^{-1} \cdot y) \mathbf{1}_{gA}(y) d\nu(y); \quad \nu \text{ is a } G\text{-invariant measure,} \\
&= \frac{1}{Z_\sigma} \int_{gA} e^{-\frac{1}{2\sigma^2} d(g^{-1} \cdot y, \eta_1)^2} d\nu(y) \\
&= \frac{1}{Z_\sigma} \int_{gA} e^{-\frac{1}{2\sigma^2} d((gg^{-1}) \cdot y, g \cdot \eta_1)^2} d\nu(y) \\
&= \frac{1}{Z_\sigma} \int_{gA} e^{-\frac{1}{2\sigma^2} d(y, \eta'_1)^2} d\nu(y) \\
&= \int_{gA} p_{\eta'_1, \sigma}(y) d\nu(y) \\
&= \int_{A'} p_{\eta'_1, \sigma}(y) d\nu(y).
\end{aligned}$$

636 For  $\int_A p_{\eta_2, \sigma}(y) d\nu(y)$ , the proof is the same. Combine with the result of case (1), we have finished  
637 the proof for case (3).

638 □

## 639 A.6 Simulation Details

640 For sampling from Riemannian Gaussian distribution  $N_{\mathcal{M}}(\theta, \sigma^2)$  on  $S^1$  (section 4.2), we first sample  
641 from truncated normal distribution with  $\mu = 0$  and  $\sigma^2$ , then embed the sample to  $\mathbb{R}$  and lastly  
642 counter-wise rotate the sample with degree  $\theta$ .

643 For simulation on  $S^2$  (section 5.2), we choose the pair of  $\eta$  and  $\eta'$  to be  $(1, 0, 0)$  and  $(\cos(\Delta), (1 -$   
644  $\cos(\Delta)^2)^{1/2}, 0)$ . Though any pair  $\eta, \eta' \in S^2$  with  $d(\eta, \eta') = \Delta$  works, we simply choose this  
645 specific pair for convenience. For Fréchet mean computation, we use a gradient descent algorithm  
646 described in Reimherr and Awan [2019].

### 647 A.6.1 R Codes

648 For simulations in section 4.2, refer to R files `euclid_functions.R` & `euclid_simulation.R` for Euclidean  
649 space and `sphere_functions.R` & `s1_simulation.R` for unit circle  $S^1$ . For simulations in section 5.2,  
650 refer to R files `sphere_functions.R` & `sphere_simulation.R`.
